# Supplementary material
Source: Springer Nature journal article supplement (https://www.springermedizin.de/resource/supplementary/12885_2012_3693_MOESM3_ESM.pdf/9465140)
Supplement: MOESM3 [file 9465140]

Female MBC patients with luminal subtypes (n = 305)  
2007.2 ~ 2010.12

Signed informed consent,  
underwent PET/CT and  
baseline information was gathered

Screening

Excluded (n = 152)

29 with history of diabetes mellitus

8 with a second primary cancer diagnosed

12 with ECOG 3 and life expectancy < 3 months

57 with previous treatment in metastatic setting

46 with no evaluable lesions documented

by abnormal FDG uptake

Withdrew the consent (n = 19)

Eligible patients (n= 134)
